# Supplementary material for: Association of proton pump inhibitors and concomitant drugs with risk of acute kidney injury: a nested case–control study
Source: PubMed Central journal article supplement — BMJ Open. 2021 Feb 15;11(2):e041543. doi: 10.1136/bmjopen-2020-041543 (PMC7887345; doi:10.1136/bmjopen-2020-041543), 2021-02-15
Supplement: bmjopen-2020-041543supp001.pdf [file bmjopen-2020-041543supp001.pdf]

Supplemental Table 1 International Classification of Disease 10<sup>th</sup> (ICD-10) version codes and standardized procedural codes to identify renal diseases.

| Description                                                              | ICD-10 code                          |
|--------------------------------------------------------------------------|--------------------------------------|
| Acute nephritic syndrome                                                 | N00X                                 |
| Rapidly progressive nephritic syndrome                                   | N01X                                 |
| Recurrent and persistent haematuria                                      | N02X                                 |
| Chronic nephritic syndrome                                               | N03X                                 |
| Nephrotic syndrome                                                       | N04X                                 |
| Unspecified nephritic syndrome                                           | N05X                                 |
| Isolated proteinuria with specified morphological lesion                 | N06X                                 |
| Hereditary nephropathy, not elsewhere classified                         | N07X                                 |
| Glomerular disorders in diseases classified elsewhere                    | N08X                                 |
| Acute tubulo-interstitial nephritis                                      | N10X                                 |
| Chronic tubulo-interstitial nephritis                                    | N118, N119                           |
| Tubulo-interstitial nephritis, not specified as acute or chronic         | N12X                                 |
| Obstructive and reflux uropathy                                          | N13X                                 |
| Drug- and heavy-metal-induced tubulo-interstitial and tubular conditions | N14X                                 |
| Other renal tubulo-interstitial diseases                                 | N15X                                 |
| Renal tubulo-interstitial disorders in diseases classified elsewhere     | N16X                                 |
| Acute renal failure                                                      | N17X                                 |
| Chronic kidney disease                                                   | N18X                                 |
| Unspecified kidney failure                                               | N19X                                 |
| Other disorders resulting from impaired renal tubular function           | N258                                 |
| Disorder resulting from impaired renal tubular function, unspecified     | N259                                 |
| Unspecified contracted kidney                                            | N26X                                 |
| Other disorders of kidney and ureter, not elsewhere classified           | N28X                                 |
| Description                                                              | Procedural codes                     |
| Hemodialysis, Peritoneal dialysis or renal replacement therapy           | C102, J038, J038-2, J039, J041, J042 |

Supplemental Table 2 Definition of the study drugs.

| Class or drug name                               | ATC index code                                                                    |
|--------------------------------------------------|-----------------------------------------------------------------------------------|
| Proton pump inhibitors (PPIs)                    |                                                                                   |
| Esomeprazole                                     | (WHO) A02BC05                                                                     |
| Lansoprazole                                     | (WHO) A02BC03, A02BD03, A02BD07, B01AC56                                          |
| Omeprazole                                       | (WHO) A02BC01                                                                     |
| Rabeprazole                                      | (WHO) A02BC04, A02BD12, A02BD13                                                   |
| Vonoprazan                                       | (WHO) A02BC08, A02BD14, A02BD15                                                   |
| Non-steroidal anti-inflammatory drugs (NSAIDs) † | (EphMRA) M01A1                                                                    |
| Penicillin antibiotics †                         | (EphMRA) J01C1, J01C2; (WHO) A02BD03, A02BD07, A02BD12, A02BD13, A02BD14, A02BD15 |
| Macrolide antibiotics †                          | (EphMRA) J01F-; (WHO) A02BD07, A02BD12, A02BD14                                   |
| Cephalosporin antibiotics †                      | (EphMRA) J01D1, J01D2                                                             |
| Fluoroquinolone antibiotics †                    | (EphMRA) J01G1, J01G2                                                             |

The study drugs were identified using the ATC index codes developed by the European Pharmaceutical Market Research Association (EphMRA) or World Health Organization (WHO). †Topical agents were excluded.

Supplemental Table 3 Drugs suspected to increase risk of AKI.

| Class name               | EphMRA ATC index code | Class name                 | EphMRA ATC index code |
|--------------------------|-----------------------|----------------------------|-----------------------|
| H2 blocker               | A02B1                 | Fluoroquinolone antibiotic | J01G1, J01G2          |
| Loop diuretic            | C03A2                 | Aminoglycoside antibiotic  | J01K-                 |
| Thiazide diuretic        | C03A3                 | Monobactam antibiotic      | J01P1                 |
| Tetracycline antibiotic  | J01A-                 | Carbapenem antibiotic      | J01P2                 |
| Penicillin antibiotic    | J01C1, J01C2          | NSAIDs                     | M01A1, M01A3, M02A-   |
| Cephalosporin antibiotic | J01D1, J01D2          | Contrast media             | T01A-, T01B-          |
| Macrolide antibiotic     | J01F-                 |                            |                       |

| Drug name                     |                |                  |                 |
|-------------------------------|----------------|------------------|-----------------|
| Miconazole                    | Polymyxin B    | Amphotericin B   | Vancomycin      |
| Sulfasalazine                 | Mesalazine     | Acetylsalicylate | Dextran         |
| Hydroxyethyl starch           | Mannitol       | Ephedrine        | Triamterene     |
| Polidocanol                   | Captopril      | Acyclovir        | Tacrolimus      |
| Trimethoprim-Sulfamethoxazole | Teicoplanin    | Fluconazole      | Itraconazole    |
| Voriconazole                  | Rifampicin     | Foscarnet        | Indinavir       |
| Telaprevir                    | Simeprevir     | Tenofovir        | Adefovir        |
| Oseltamivir                   | Immunoglobulin | Ifosfamide       | Streptozocin    |
| Methotrexate                  | Pemetrexed     | Cytarabine       | Tegafur         |
| Bleomycin                     | Mitomycin C    | Cisplatin        | Imatinib        |
| Sunitinib                     | Sorafenib      | Temsirolimus     | Interferon alfa |
| Interferon beta               | Sirolimus      | Cyclosporine     | Azathioprine    |
| Allopurinol                   | Alendronate    | Zoledronic acid  | Cocaine         |
| Acetaminophen                 | Phenytoin      | Carbamazepine    | Valproic acid   |
| Clozapine                     | Lithium        | Edaravone        | Pentamidine     |
| Deferasirox                   |                |                  |                 |

This list of drugs is based on the formulary described in the 'Clinical Practice Guideline for Drug-induced Kidney Injury in Japan 2016' published by the Japanese Society of Nephrology. To identify the nephrotoxic drugs in database, the EphMRA ATC codes or the specific drug names were used.

Supplemental Table 4 Characteristics of current PPI users in cases and controls.

| Characteristics                                      | Current PPI users |                    |
|------------------------------------------------------|-------------------|--------------------|
|                                                      | Cases (n = 148)   | Controls (n = 655) |
| Age, years, mean (SD)                                | 54 (13)           | 55 (13)            |
| Female, n (%)                                        | 43 (29.1)         | 195 (29.8)         |
| Duration of follow-up, days, mean (SD)               | 313 (404)         | 319 (431)          |
| Comorbidity, n (%)                                   |                   |                    |
| Hypertension                                         | 40 (27.0)         | 225 (34.4)         |
| Congestive heart failure                             | 12 (8.1)          | 39 (6.0)           |
| Diabetes                                             | 22 (14.9)         | 122 (18.6)         |
| Liver disease                                        | 15 (10.1)         | 78 (11.9)          |
| Pulmonary disease                                    | 10 (6.8)          | 48 (7.3)           |
| Cancer                                               | 32 (21.6)         | 38 (5.8)           |
| Charlson comorbidity index, median (IQR)             | 1 (0 to 3)        | 0 (0 to 2)         |
| PPIs prescribed at the last time, n (%)              |                   |                    |
| Lansoprazole                                         | 54 (36.5)         | 222 (33.9)         |
| Esomeprazole                                         | 48 (32.4)         | 180 (27.5)         |
| Rabeprazole                                          | 29 (19.6)         | 140 (21.4)         |
| Omeprazole                                           | 10 (6.8)          | 59 (9.0)           |
| Vonoprazan                                           | 7 (4.7)           | 54 (8.2)           |
| Current use of nephrotoxic drugs, n (%) <sup>†</sup> | 113 (77.9)        | 349 (53.3)         |

SD, standard deviation; IQR, interquartile range. <sup>†</sup>Three cases (2.0%) had missing data.

Supplemental Table 5 Sensitivity analyses.

| Current drug use                                                                                            | Cases  | Controls | Matched odds ratio (95% CI) † |
|-------------------------------------------------------------------------------------------------------------|--------|----------|-------------------------------|
| Setting the index date 1 week before the diagnosis (Cases, n = 294; Controls, n = 2,920)                    |        |          |                               |
| Current use of PPIs                                                                                         |        |          |                               |
| With NSAIDs (Yes/No)                                                                                        | 44/82  | 75/422   | 4.04 (2.27 to 7.42)           |
| With penicillins (Yes/No)                                                                                   | 12/114 | 41/456   | 1.54 (0.65 to 3.59)           |
| With macrolides (Yes/No)                                                                                    | 8/118  | 50/447   | 0.76 (0.29 to 1.79)           |
| With cephalosporins (Yes/No)                                                                                | 16/110 | 25/472   | 2.63 (1.25 to 5.56)           |
| With fluoroquinolones (Yes/No)                                                                              | 7/119  | 19/478   | 1.66 (0.59 to 4.36)           |
| Following patients for up to 120 days from the cohort entry (Cases, n = 99; Controls, n = 990)              |        |          |                               |
| Current use of PPIs                                                                                         |        |          |                               |
| With NSAIDs (Yes/No)                                                                                        | 29/41  | 66/318   | 3.50 (1.91 to 6.53)           |
| With penicillins (Yes/No)                                                                                   | 10/60  | 98/286   | 0.49 (0.23 to 0.98)           |
| With macrolides (Yes/No)                                                                                    | 7/63   | 94/290   | 0.32 (0.12 to 0.72)           |
| With cephalosporins (Yes/No)                                                                                | 16/54  | 36/348   | 3.44 (1.61 to 7.40)           |
| With fluoroquinolones (Yes/No)                                                                              | 12/58  | 21/363   | 4.65 (1.87 to 12.10)          |
| Including patients diagnosed with AIN into cases (Cases, n = 475; Controls, n = 4,721)                      |        |          |                               |
| Current use of PPIs                                                                                         |        |          |                               |
| With NSAIDs (Yes/No)                                                                                        | 68/142 | 186/824  | 2.01 (1.35 to 2.99)           |
| With penicillins (Yes/No)                                                                                   | 40/170 | 118/892  | 1.50 (0.95 to 2.35)           |
| With macrolides (Yes/No)                                                                                    | 34/176 | 138/872  | 1.16 (0.74 to 1.78)           |
| With cephalosporins (Yes/No)                                                                                | 30/180 | 77/933   | 2.00 (1.17 to 3.40)           |
| With fluoroquinolones (Yes/No)                                                                              | 20/190 | 44/966   | 2.11 (1.09 to 3.96)           |
| Including patients with previous renal diseases into the study cohort (Cases, n = 517; Controls, n = 5,143) |        |          |                               |
| Current use of PPIs                                                                                         |        |          |                               |
| With NSAIDs (Yes/No)                                                                                        | 80/164 | 180/943  | 2.80 (1.96 to 4.02)           |
| With penicillins (Yes/No)                                                                                   | 27/217 | 129/994  | 1.12 (0.68 to 1.80)           |
| With macrolides (Yes/No)                                                                                    | 23/221 | 160/963  | 0.69 (0.41 to 1.11)           |
| With cephalosporins (Yes/No)                                                                                | 54/190 | 80/1,043 | 3.81 (2.46 to 5.92)           |
| With fluoroquinolones (Yes/No)                                                                              | 28/216 | 60/1,063 | 2.24 (1.31 to 3.80)           |

CI, confidence interval. †Odds ratios of AKI for current drug combinations compared with PPIs alone were estimated using the conditional logistic regression model.
